# Supplementary material
Source: PubMed Central journal article supplement (PMC8027859)
Supplement: 41386_2020_935_MOESM1_ESM.pdf [file 41386_2020_935_MOESM1_ESM.pdf]

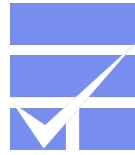

# CONSORT

TRANSPARENT REPORTING of TRIALS

## CONSORT 2010 Flow Diagram

### Enrollment

Assessed for eligibility (n=776)

Excluded (n=515)

- ◆ Not meeting inclusion criteria (n=420)
- ◆ Declined to participate (n=58)
- ◆ Other reasons (n=37)

Randomized (n=245)

### Allocation

Allocated to sham tDCS + Placebo (n=60)

- ◆ Received allocated intervention (n=60)
- ◆ Did not receive allocated intervention (n=0)

Allocated to active Escitalopram + Placebo (n=91)

- ◆ Received allocated intervention (n=91)
- ◆ Did not receive allocated intervention (n=0)

Allocated to active tDCS + Placebo (n=94)

- ◆ Received allocated intervention (n=94)
- ◆ Did not receive allocated intervention (n=0)

### Follow-Up

Lost to follow-up (n=5)

See NEJM: Brunoni et al., 2017

Lost to follow-up (give reasons) (n=15)

See NEJM: Brunoni et al., 2017

Lost to follow-up (give reasons) (n=22)

See NEJM: Brunoni et al., 2017

### Analysis

Analysed ITT (n=60)

- ◆ Excluded from analysis (n=0)

Analysed ITT (n=15)

- ◆ Excluded from (n=0)

Analysed ITT (n=94)

- ◆ Excluded from (n=0)

Note: The current study is a secondary analysis. Main results are presented in Brunoni AR, et al. Trial of Electrical Direct-Current Therapy versus Escitalopram for Depression. N Engl J Med. 2017
