# Supplementary material
Source: PubMed Central journal article supplement (PMC8027859)
Supplement: 41386_2020_935_MOESM2_ESM.pdf [file 41386_2020_935_MOESM2_ESM.pdf]

## Supplementary Materials and Methods

**Appendix 1.** Detailed information on participants, interventions, assessments, and statistical analyses

**Table S1.** Additional baseline information about patients receiving tDCS, escitalopram and placebo treatment for depression, by symptom trajectory class

**Table S2.** Posterior classification for patient groups treated with tDCS, escitalopram, and placebo

**Table S3.** Model and class specific fit indices for optimal latent class solutions in patient groups treated with tDCS, escitalopram, and placebo

**Table S4.** Mean of posterior probabilities in each class for patient groups treated with tDCS, escitalopram, and placebo

**Table S5.** Posterior probabilities above a threshold (%) for patient groups treated with tDCS, escitalopram, and placebo

**Table S6.** Response and remission rates for distinct trajectory classes within each treatment arm

**Table S7.** Results of Hosmer-Lemeshow tests for goodness of fit in multinomial regression models within each treatment arm

**Figure S1.** Top ranked features from all elastic net iterations

This supplementary material has been provided by the authors to give readers additional information about their work.

## **Appendix 1.** Detailed information on participants, interventions, assessments, and statistical analyses

### ***Participants***

Eligible participants were interviewed and diagnosed by board-certified psychiatrists using the Mini-International Neuropsychiatric Interview (MINI) [1]. Only those with a Hamilton Depression Rating Scale (17-items, HAM-D) score  $\geq 17$  [2] and low suicide risk (MINI) were included. The exclusion criteria included other neuropsychiatric conditions (except for anxiety disorders as comorbidity), pregnancy, specific contraindications to tDCS (e.g., metal plates in the head), and participation in previous tDCS trials. All patients had been escitalopram-naïve, as escitalopram was the active comparator, and free of antidepressant medications for at least 5 half-lives of the drug—at least 2 weeks for venlafaxine and paroxetine, due to withdrawal symptoms, and 5 weeks for fluoxetine.

### ***Interventions***

We used customized Soterix devices (devices, sponges and headgears [EASYstrap], SoterixMedical, New York, NY) to perform the tDCS sessions. The parameters were: 2mA current intensity, 25cm<sup>2</sup> saline-soaked sponges (current density = 0.8 A/m<sup>2</sup>), 30 min/day, with the anode and the cathode positioned over the left and right DLPFC, respectively, targeted using the "Omni-Lateral-Electrode" method [3]. Ramp-up and ramp-down periods of 30 and 15 seconds were employed. TDCS sessions were performed by trained nurses.

Escitalopram was chosen due to its efficacy, tolerability, availability, and cost [4]. The placebo pill had the same color, appearance, taste and size as escitalopram.

### *Statistical analyses*

The optimal number of trajectories and optimal polynomial degree were determined using the improvement in model fit, represented by the Bayesian information criterion (BIC). We used the BIC log Bayes factor approximation, defined as two times the difference in BIC between a more complex versus a less complex model for model selection. The BIC log Bayes factor has been demonstrated to be an acceptable approximation to the log Bayes factor criterion [5]. When it exceeded more than 10 points in difference, the model with a higher degree of complexity was favored [6].

The optimal parameters were determined by systematically reducing the number of trajectory classes and polynomial degree for each trajectory until models reached a single class with linear polynomial degree.

Criteria for overall model adequacy were reported (Akaike Information Criterion, BIC, entropy, relative-entropy).

A priori selected variables were entered into the multinomial logistic regression models simultaneously.

We explored potential novel predictors of response using a data-driven approach that included all available clinical information from the trial ( $k=51$  predictors), such as syndrome-specific rating scales (TCI, MADRS, BDI), and also demographic and clinical variables. To avoid issues related to large numbers of predictors and multicollinearity in combination with (e.g. multicollinearity, lack of power), we a variable pre-selection procedure was performed a stability ranking procedure in combination with elastic net regularization [7]. The approach has two effects: it shrinks coefficients of correlated predictors towards each other, and removes uninformative variables from the model. While other approaches for high numbers of predictors have been heavily criticized for overfitting the data (e.g., stepwise regression, selection based on significance of univariate correlation), this procedure makes the selection

process more reliable by adding resampling to the variable selection, hence avoiding fitting only one model but fitting many different ones on subsets. We derived features from 1000 iterations of elastic net regularization using 3-fold cross-validation to find optimal proportions between penalization (least absolute shrinkage and selection operator, LASSO) and regularization (Tikhonov regularization, also known as ridge-regression). Elastic net models were run on k-nearest-neighbor imputed (k=5) predictor variables [8], as they do not support missing data [9].

To avoid circularity, no confirmatory modeling of the identified associations was applied. Instead the features are presented ranked by their selection stability to provide points of reference in the planning of future confirmatory studies. As proxies for relevance and directionality of effects, we supplied each feature's selection probability across the hyperparameter space and log-odds with 99.9% confidence intervals (i.e. adjusted for the total number of features), respectively.

**Table S1.** Additional baseline information about patients receiving tDCS + placebo, escitalopram + sham tDCS and placebo + sham tDCS for depression, by symptom trajectory class

| Characteristic                         | tDCS + placebo, m (SD) |              |                    | Escitalopram + sham tDCS, m (SD) |              |                    | Placebo + sham tDCS, m (SD) |              |                   |
|----------------------------------------|------------------------|--------------|--------------------|----------------------------------|--------------|--------------------|-----------------------------|--------------|-------------------|
|                                        | rapid (N=41)           | slow (N=31)  | no/mini mal (N=22) | rapid (N=23)                     | slow (N=52)  | no/mini mal (N=12) | rapid (N=26)                | slow (N=24)  | no/mini mal(N=10) |
| <b>Family and employment</b>           |                        |              |                    |                                  |              |                    |                             |              |                   |
| Schooling — yr                         | 15.26 (5.47)           | 15.04 (4.99) | 15.58 (3.69)       | 13.83 (3.95)                     | 15.42 (4.09) | 14.91 (4.09)       | 15.59 (4.57)                | 16.12 (3.3)  | 15.56 (3.61)      |
| Married — no. (%)                      | 22 (54)                | 16 (52)      | 9 (41)             | 9 (39)                           | 22 (42)      | 5 (42)             | 12 (46)                     | 4 (17)       | 1 (10)            |
| Unemployed — no. (%)                   | 9 (22)                 | 10 (32)      | 9 (41)             | 4 (17)                           | 16 (31)      | 4 (33)             | 9 (35)                      | 3 (12)       | 5 (50)            |
| History of depression                  |                        |              |                    |                                  |              |                    |                             |              |                   |
| Family history of depression — no. (%) | 30 (73)                | 19 (61)      | 15 (68)            | 17 (74)                          | 31 (60)      | 6 (50)             | 15 (58)                     | 17 (71)      | 7 (70)            |
| <b>Clinical characteristics</b>        |                        |              |                    |                                  |              |                    |                             |              |                   |
| Smoker — no. (%)                       | 10 (24)                | 3 (10)       | 5 (23)             | 8 (35)                           | 14 (27)      | 4 (33)             | 1 (4)                       | 7 (29)       | 3 (30)            |
| BMI                                    | 25.68 (4.49)           | 26.24 (5.59) | 24.65 (4.18)       | 27.67 (4.08)                     | 27.02 (6.56) | 25.79 (3.29)       | 26.91 (5.62)                | 26.05 (6.23) | 25.22 (5.66)      |
| Hypertension — no. (%)                 | 8 (20)                 | 9 (29)       | 4 (18)             | 7 (30)                           | 8 (15)       | 3 (25)             | 6 (23)                      | 4 (17)       | 3 (30)            |

|                             |        |        |            |        |        |        |            |       |            |
|-----------------------------|--------|--------|------------|--------|--------|--------|------------|-------|------------|
| Diabetes — no.<br>(%)       | 2 (5)  | 2 (6)  | NA<br>(NA) | 3 (13) | 8 (15) | 2 (17) | 5 (19)     | 1 (4) | NA<br>(NA) |
| Hypothyroidism<br>— no. (%) | 7 (17) | 5 (16) | 2 (9)      | 4 (17) | 5 (10) | 2 (17) | NA<br>(NA) | 1 (4) | NA<br>(NA) |

---

Note: BMI Body mass index

**Table S2.** Posterior classification for patient groups treated with tDCS + placebo, escitalopram + sham tDCS, and placebo + sham tDCS

|          | tDCS + placebo |       |            | Escitalopram + sham tDCS |       |      |            | Placebo + sham tDCS |      |            |
|----------|----------------|-------|------------|--------------------------|-------|------|------------|---------------------|------|------------|
|          | rapid          | slow  | no/minimal | rapid                    | slow  | late | no/minimal | rapid               | slow | no/minimal |
| <b>N</b> | 41.00          | 31.00 | 22.0       | 23.00                    | 52.00 | 4.0  | 12.00      | 26.00               | 24   | 10.00      |
| <b>%</b> | 43.62          | 32.98 | 23.4       | 25.27                    | 57.14 | 4.4  | 13.19      | 43.33               | 40   | 16.67      |

Note: Assessing the clinical meaningfulness of the trajectory patterns, aiming to include classes with at least 5% capture of the population

**Table S3.** Model and class specific fit indices for optimal latent class solutions in patient groups treated with tDCS + placebo, escitalopram + sham tDCS, and placebo + sham tDCS

| Treatment/Class                 | Model specific |         |         |                  | Class specific |          |
|---------------------------------|----------------|---------|---------|------------------|----------------|----------|
|                                 | AIC            | BIC     | Entropy | Relative Entropy | APPA           | OCC      |
| <b>tDCS + placebo</b>           | 3373.67        | 3404.19 | 24.86   | 0.76             |                |          |
| rapid improvement (N=41)        |                |         |         |                  | 0.916          | 15.428   |
| slow improvement (N=31)         |                |         |         |                  | 0.851          | 10.653   |
| no/minimal improvement (N=22)   |                |         |         |                  | 0.857          | 19.176   |
| <b>Escitalopram + sham tDCS</b> | 3218.17        | 3258.35 | 26.43   | 0.79             |                |          |
| rapid improvement (N=23)        |                |         |         |                  | 0.873          | 19.211   |
| slow improvement (N=52)         |                |         |         |                  | 0.867          | 5.541    |
| late improvement (N=4)          |                |         |         |                  | 0.988          | 1398.018 |
| no/minimal improvement (N=12)   |                |         |         |                  | 0.851          | 35.236   |
| <b>Placebo + sham tDCS</b>      | 2334.89        | 2360.02 | 12.44   | 0.81             |                |          |
| rapid improvement (N=26)        |                |         |         |                  | 0.932          | 18.579   |
| slow improvement (N=24)         |                |         |         |                  | 0.912          | 14.557   |



no/minimal improvement  
(N=10)

0.878

37.029

---

**Recommendation**

relative/small

relative/small

close to 0

close to 1

>.70

>5

---

Note: AIC Akaike information criterion; BIC Bayesian information criterion; APPA average maximum posterior probability of assignments;  
OCC odds of correct classification

**Table S4.** Mean of posterior probabilities in each class for patient groups treated with tDCS + placebo, escitalopram + sham tDCS, and placebo + sham tDCS

|                                 | Probability 1 | Probability 2 | Probability 3 | Probability 4 |
|---------------------------------|---------------|---------------|---------------|---------------|
| <b>tDCS + placebo</b>           |               |               |               |               |
| rapid improvement               | 0.9156        | 0.0810        | 0.0034        | NA            |
| slow improvement                | 0.0406        | 0.8513        | 0.1081        | NA            |
| no/minimal improvement          | 0.0005        | 0.1428        | 0.8567        | NA            |
| <b>Escitalopram + sham tDCS</b> |               |               |               |               |
| rapid improvement               | 0.8731        | 0.1261        | 0.0000        | 0.0008        |
| slow improvement                | 0.0752        | 0.8673        | 0.0103        | 0.0472        |
| late improvement                | 0.0001        | 0.0079        | 0.9880        | 0.0040        |
| no/minimal improvement          | 0.0000        | 0.1009        | 0.0480        | 0.8511        |
| <b>Placebo + sham tDCS</b>      |               |               |               |               |
| rapid improvement               | 0.9315        | 0.0684        | 0.0000        | NA            |
| slow improvement                | 0.0476        | 0.9116        | 0.0408        | NA            |
| no/minimal improvement          | 0.0000        | 0.1221        | 0.8779        | NA            |

Note: Mean posterior probability in same class should not be <0.70

**Table S5.** Posterior probabilities above a threshold (%) for patient groups treated with tDCS + placebo, escitalopram + sham tDCS, and placebo + sham tDCS

| Cutoff              | tDCS + placebo |       |            | Escitalopram + sham tDCS |       |      |            | Placebo + sham tDCS |       |            |
|---------------------|----------------|-------|------------|--------------------------|-------|------|------------|---------------------|-------|------------|
|                     | rapid          | slow  | no/minimal | rapid                    | slow  | late | no/minimal | rapid               | slow  | no/minimal |
| <b>Prob &gt;0.7</b> | 85.37          | 77.42 | 77.27      | 78.26                    | 78.85 | 100  | 75.00      | 96.15               | 91.67 | 80         |
| <b>Prob &gt;0.8</b> | 82.93          | 74.19 | 68.18      | 69.57                    | 67.31 | 100  | 58.33      | 80.77               | 83.33 | 70         |
| <b>Prob &gt;0.9</b> | 73.17          | 61.29 | 54.55      | 65.22                    | 59.62 | 100  | 58.33      | 69.23               | 66.67 | 60         |

**Table S6:** Response and remission rates for distinct trajectory classes within each treatment arm

| Outcome                 | tDCS + placebo |               |              |                   | P-Value | Escitalopram + sham tDCS |               |                   | P-Value | Placebo + sham tDCS |             |                   | P-Value |
|-------------------------|----------------|---------------|--------------|-------------------|---------|--------------------------|---------------|-------------------|---------|---------------------|-------------|-------------------|---------|
|                         | Total Sample   | rapid (N=41)  | slow (N=31)  | no/minimal (N=22) |         | rapid (N=23)             | slow (N=52)   | no/minimal (N=12) |         | rapid (N=26)        | Slow (N=24) | no/minimal (N=10) |         |
| <b>Response, n (%)</b>  |                |               |              |                   |         |                          |               |                   |         |                     |             |                   |         |
| Week 1                  | 49<br>(20.33)  | 18<br>(43.9)  | 1<br>(3.23)  | 0 (0)             | <.001   | 11<br>(47.83)            | 9<br>(17.31)  | 0 (0)             | 0.003   | 7<br>(26.92)        | 3<br>(12.5) | 0 (0)             | 0.147   |
| Week 2                  | 65<br>(26.97)  | 17<br>(41.46) | 2<br>(6.45)  | 0 (0)             | <.001   | 15<br>(65.22)            | 16<br>(30.77) | 1 (8.33)          | 0.001   | 11<br>(42.31)       | 3<br>(12.5) | 0 (0)             | 0.004   |
| Week 3                  | 79<br>(32.78)  | 24<br>(58.54) | 5<br>(16.13) | 0 (0)             | <.001   | 12<br>(52.17)            | 20<br>(38.46) | 0 (0)             | 0.002   | 15<br>(57.69)       | 2<br>(8.33) | 1 (10)            | <.001   |
| Week 6                  | 80<br>(33.2)   | 19<br>(46.34) | 4<br>(12.9)  | 1 (4.55)          | <.001   | 17<br>(73.91)            | 17<br>(32.69) | 1 (8.33)          | <.001   | 17<br>(65.38)       | 3<br>(12.5) | 1 (10)            | <.001   |
| Week 8                  | 83<br>(34.44)  | 23<br>(56.1)  | 8<br>(25.81) | 0 (0)             | <.001   | 18<br>(78.26)            | 19<br>(36.54) | 0 (0)             | <.001   | 13<br>(50)          | 2<br>(8.33) | 0 (0)             | <.001   |
| Week 10                 | 79<br>(32.78)  | 27<br>(65.85) | 5<br>(16.13) | 1 (4.55)          | <.001   | 19<br>(82.61)            | 13<br>(25)    | 1 (8.33)          | <.001   | 13<br>(50)          | 0 (0)       | 0 (0)             | <.001   |
| <b>Remission, n (%)</b> |                |               |              |                   |         |                          |               |                   |         |                     |             |                   |         |
| Week 1                  | 18<br>(7.47)   | 13<br>(31.71) | 0 (0)        | 0 (0)             | <.001   | 2<br>(8.7)               | 1<br>(1.92)   | 0 (0)             | 0.252   | 2<br>(7.69)         | 0 (0)       | 0 (0)             | 0.655   |
| Week 2                  | 29<br>(12.03)  | 7<br>(17.07)  | 0 (0)        | 0 (0)             | 0.006   | 12<br>(52.17)            | 5<br>(9.62)   | 0 (0)             | <.001   | 4<br>(15.38)        | 1<br>(4.17) | 0 (0)             | 0.252   |
| Week 3                  | 42<br>(17.43)  | 16<br>(39.02) | 2<br>(6.45)  | 0 (0)             | <.001   | 10<br>(43.48)            | 5<br>(9.62)   | 0 (0)             | <.001   | 9<br>(34.62)        | 0 (0)       | 0 (0)             | 0.001   |
| Week 6                  | 40<br>(16.6)   | 13<br>(31.71) | 1<br>(3.23)  | 0 (0)             | <.001   | 13<br>(56.52)            | 5<br>(9.62)   | 1 (8.33)          | <.001   | 7<br>(26.92)        | 0 (0)       | 0 (0)             | 0.004   |
| Week 8                  | 52<br>(21.58)  | 18<br>(43.9)  | 2<br>(6.45)  | 0 (0)             | <.001   | 17<br>(73.91)            | 4<br>(7.69)   | 0 (0)             | <.001   | 9<br>(34.62)        | 2<br>(8.33) | 0 (0)             | 0.006   |

|      |         |         |       |       |      |         |         |       |      |         |       |       |      |
|------|---------|---------|-------|-------|------|---------|---------|-------|------|---------|-------|-------|------|
| Week | 52      | 21      | 0 (0) | 0 (0) | <.00 | 17      | 6       | 0 (0) | <.00 | 8       | 0 (0) | 0 (0) | 0.00 |
| 10   | (21.58) | (51.22) |       |       | 1    | (73.91) | (11.54) |       | 1    | (30.77) |       |       | 5    |

---

Note: Response was defined as a reduction  $\geq 50\%$  from baseline in HAM-D scores, and remission was defined as a HAM-D score  $\leq 7$ ; P-values represent result of  $\chi^2$ -test or Fisher's exact test comparing membership ratios between trajectories; P-values were FDR corrected for the number of repeated measurements.

**Table S7.** Results of Hosmer-Lemeshow tests for goodness of fit in multinomial regression models within each treatment arm

| <b>Selection</b> | <b>Treatment</b>                | <b><math>\chi^2</math></b> | <b>df</b> | <b>P</b> |
|------------------|---------------------------------|----------------------------|-----------|----------|
| Top-down         | tDCS + <b>placebo</b>           | 14.67                      | 16        | 0.549    |
| Top-down         | Escitalopram + <b>sham tDCS</b> | 19.09                      | 16        | 0.264    |
| Top-down         | Placebo + <b>sham tDCS</b>      | 11.77                      | 16        | 0.760    |

Note: df degrees of freedom; non-significant P-value is indicative for similar observed and expected frequencies, i.e. good model fit

**Figure S1.** Top ranked features from stability selection procedure using elastic net regularization

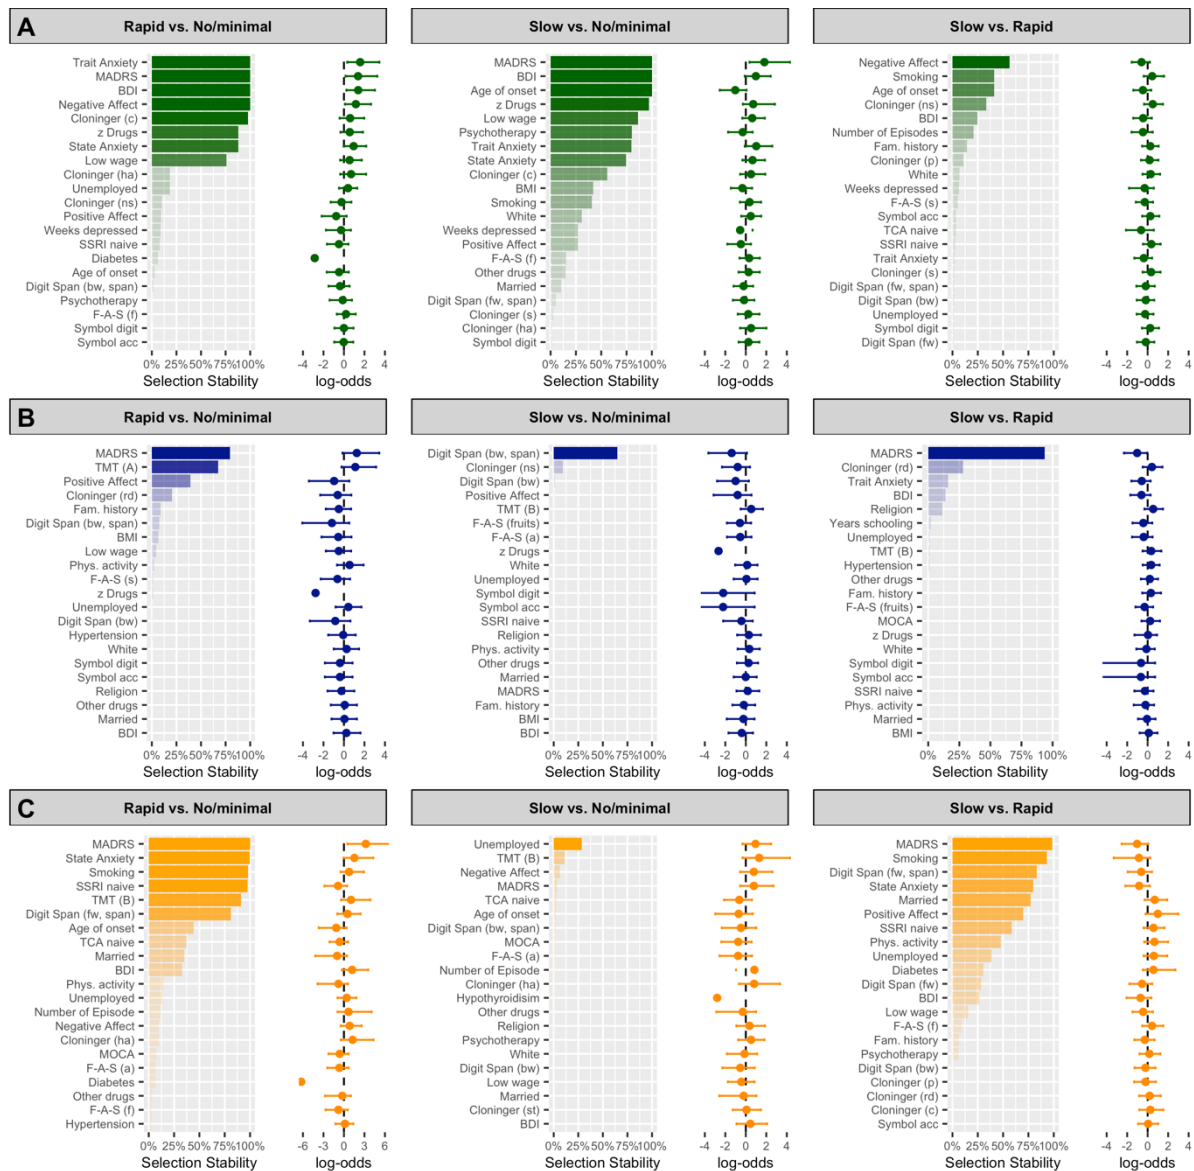

Note: (A) tDCS (B) escitalopram (C) placebo; X-axis represents selection probability throughout 1000 iterations of elastic net regularization with 3-fold cross-validation in order to find optimal proportions of penalization and regularization; Log-odds and 99.9% confidence intervals are displayed as proxies for relevance and direction of effect. Log-odds  $< 0$  and  $> 0$  are numerically associated with 1<sup>st</sup> and 2<sup>nd</sup> named group, respectively. Predictors with without log-odds confidence intervals had zero-events, thus lower bounds could not be estimated. A total of  $k=51$  predictors were included in the analysis. Predictors that are not displayed were selected 0 times. Results of the bottom-up analysis are strictly exploratory and should not be interpreted as confirmatory.

## References

1. Amorim P. Mini International Neuropsychiatric Interview (MINI): validation of a short structured diagnostic psychiatric interview. *Rev Bras Psiquiatr.* 2000;22:106–115.
2. Hamilton M. A rating scale for depression. *J Neurol Neurosurg Psychiatry.* 1960;23:56–62.
3. Seibt O, Brunoni AR, Huang Y, Bikson M. The Pursuit of DLPFC: Non-neuronavigated Methods to Target the Left Dorsolateral Pre-frontal Cortex With Symmetric Bicephalic Transcranial Direct Current Stimulation (tDCS). *Brain Stimul.* 2015;8:590–602.
4. Cipriani A, Furukawa TA, Salanti G, Geddes JR, Higgins JP, Churchill R, et al. Comparative efficacy and acceptability of 12 new-generation antidepressants: a multiple-treatments meta-analysis. *Lancet.* 2009;373:746–758.
5. Kass RE, Raftery AE. Bayes Factors. *Journal of the American Statistical Association.* 1995;90:773–795.
6. Jones BL, Nagin DS, Roeder K. A SAS Procedure Based on Mixture Models for Estimating Developmental Trajectories. *Sociol Methods Res.* 2001;29:374–393.
7. Zou H, Hastie T. Regularization and variable selection via the elastic net. *J R Stat Soc Series B Stat Methodol.* 2005;67:301–320.
8. Kowarik A, Templ M. Imputation with the R Package VIM. *J Stat Softw.* 2016;74:1–16.
9. Hastie T, Qian J. Glmnet vignette. Retrieve from [Http://www Web Stanford Edu/hastie/Papers/Glmnet\\_Vignette Pdf](http://www.Web.Stanford.Edu/hastie/Papers/Glmnet_Vignette.Pdf) Accessed September. 2014;20:2016.
